# Supplementary material for: Deconvolution of cellular subsets in human tissue based on targeted DNA methylation analysis at individual CpG sites
Source: PubMed Central journal article supplement (PMC7687708; doi:10.1186/s12915-020-00910-4), 2020-11-24
Supplement: 12915_2020_910_MOESM1_ESM.pdf [file 12915_2020_910_MOESM1_ESM.pdf]

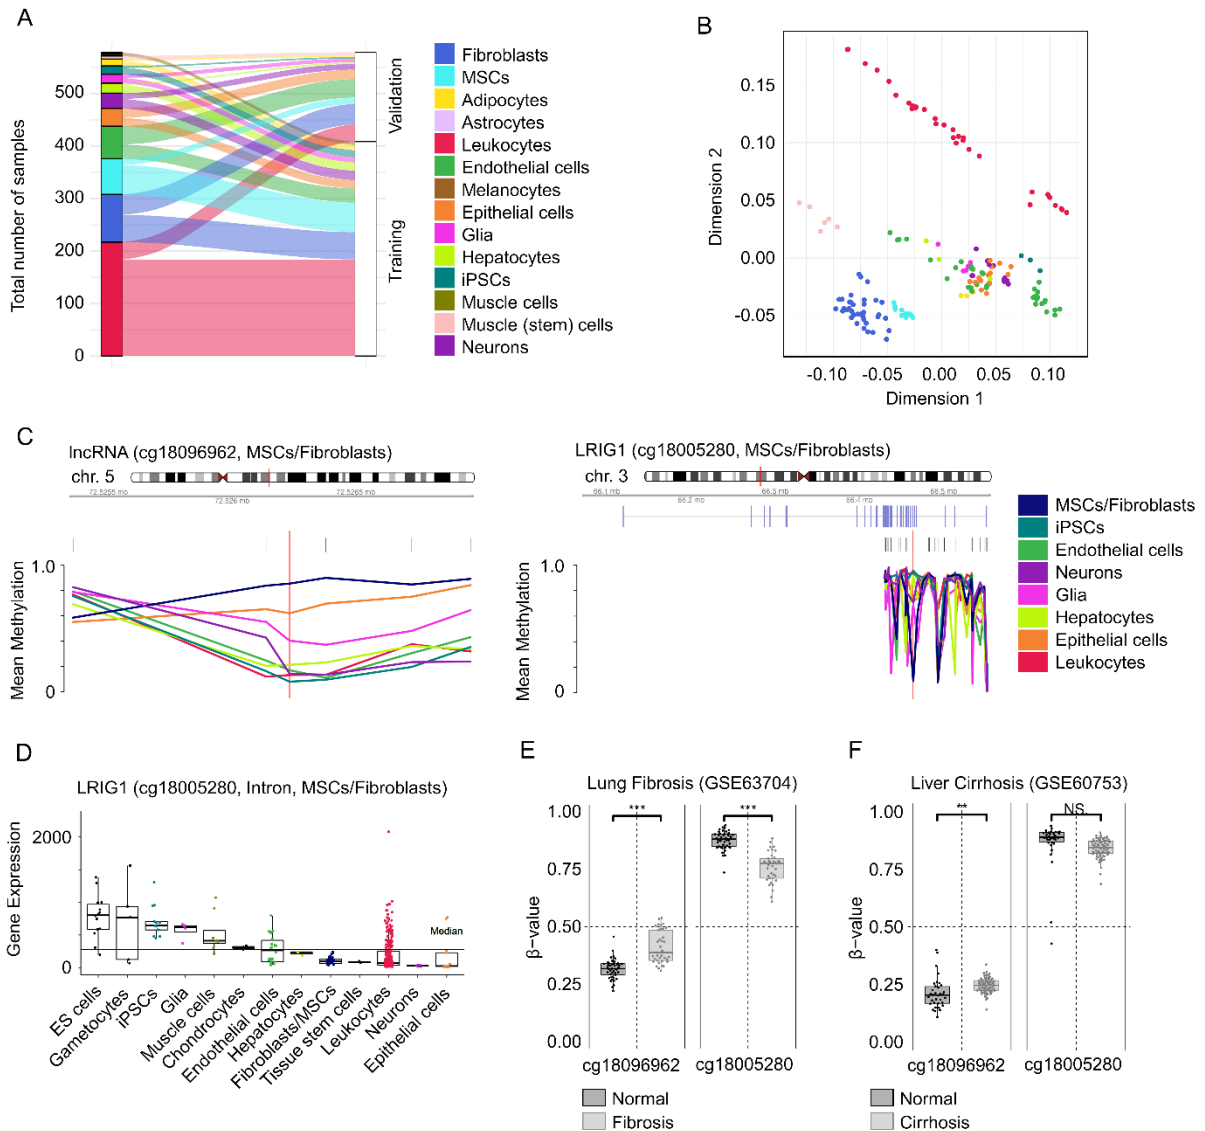

### Supplemental Figure S1: Selection of cell-type specific CpGs for fibroblasts

(A) Split of total samples ( $n = 579$ ) into training ( $n = 409$ ) and validation set ( $n = 170$ ).

(B) Multidimensional scaling (MDS) plot of the validation data ( $n = 170$ ) shows that samples cluster by cell type. For the analysis, all CpGs shared between the 450K and the EPIC BeadChip were included (except XY chromosomes).

(C) Chromosomal location and association with corresponding genes for the selected fibroblast-specific CpGs: IncRNA (*RP11-60A8.1*) and leucine rich repeats and immunoglobulin like domains 1 (*LRIG1*). Shown are mean  $\beta$  values from the training data set of neighboring CpGs for the respective cell types. The red lines depict the relevant CpGs.

(D) Gene expression estimates of the Primary Cell Atlas (67) for *LRIG1* (Affymetrix UG 133; probe 211596\_s\_at). Gene expression is relatively low in fibroblasts. Thus, there was no evidence for cell-type specific gene expression. Gene expression data was not available for the IncRNA *RP11-60A8.1*.

(E) DNAm levels ( $\beta$  values) of the two selected CpGs from the FibroScore in the lung fibrosis dataset GSE63704 (450K BeadChip) (63). Two-sided t-test: \*\*\*  $p < 0.001$ .

(F) DNAm levels ( $\beta$  values) of the two selected CpGs from the FibroScore in the liver cirrhosis dataset GSE60753 (450K BeadChip) (29). Two-sided t-test: \*\*  $p < 0.01$ , NS = not significant.

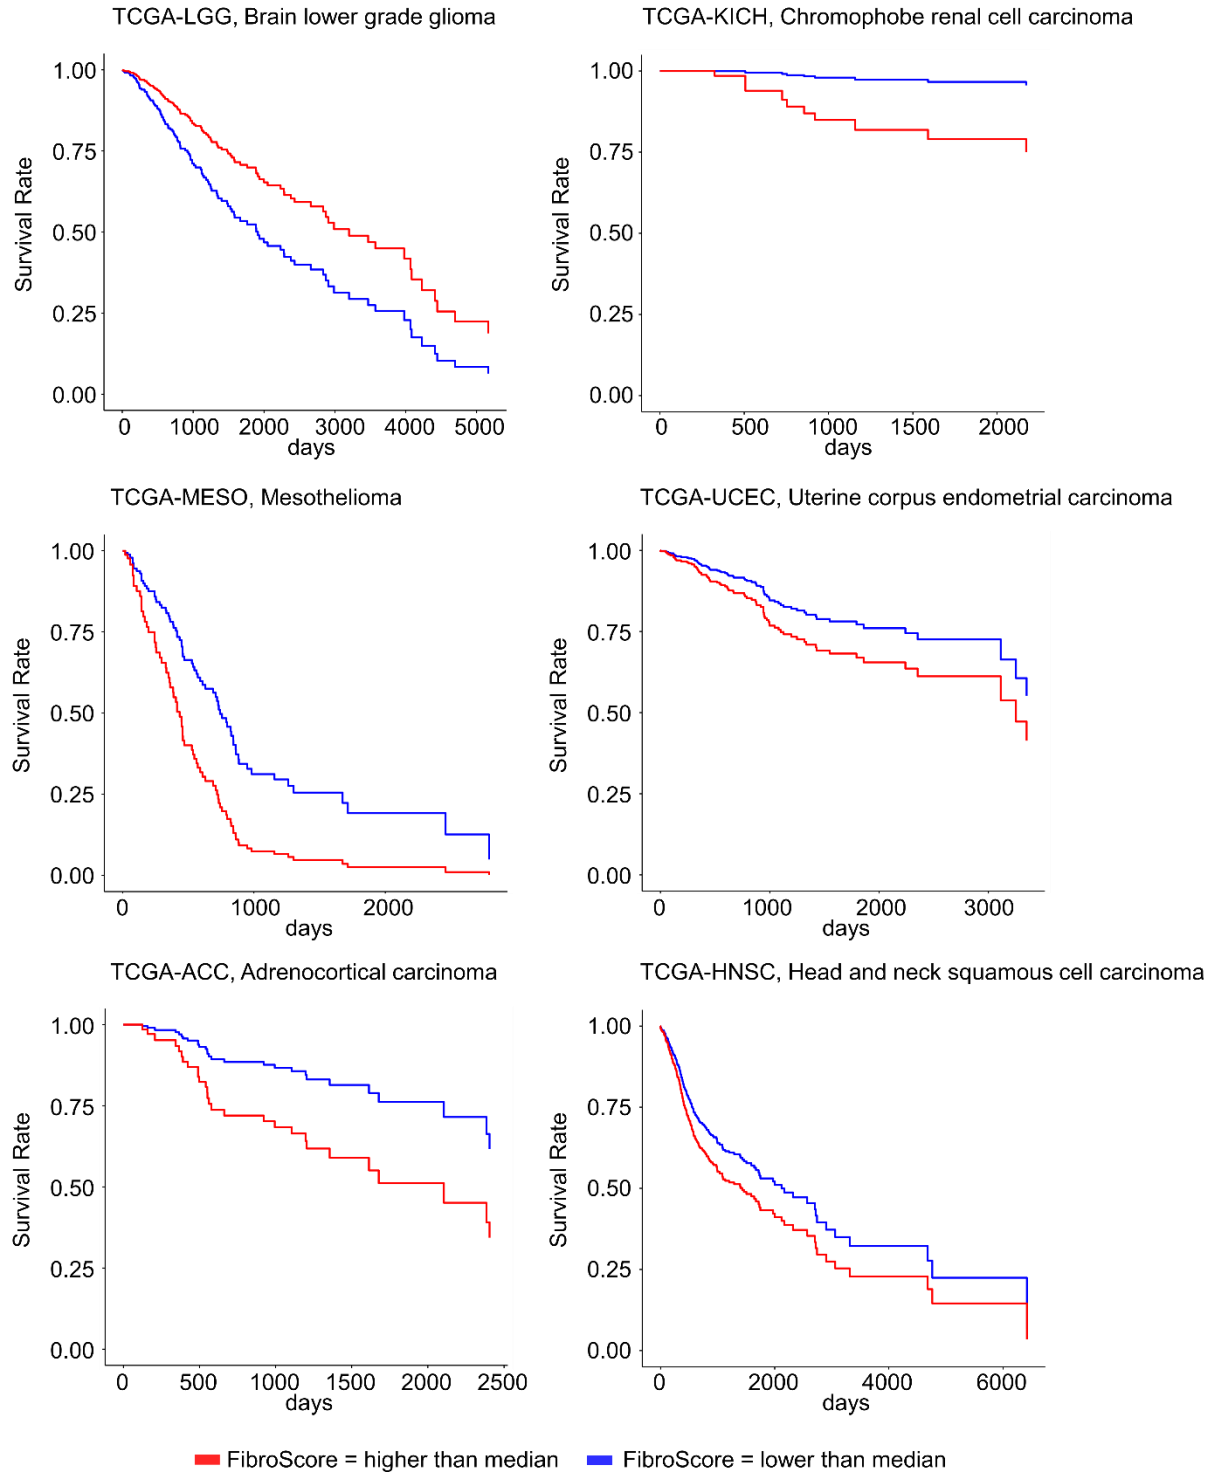

**Supplemental Figure S2: Cox proportional hazards adjusted survival curves for FibroScore**

Survival curves for the six types of cancer for which there is a significant difference in overall survival for patients with either high or low FibroScore. Depicted is the difference between the groups stratified as low or high FibroScore. The model takes (when available) sex, age, tumor stage and FibroScore into account.

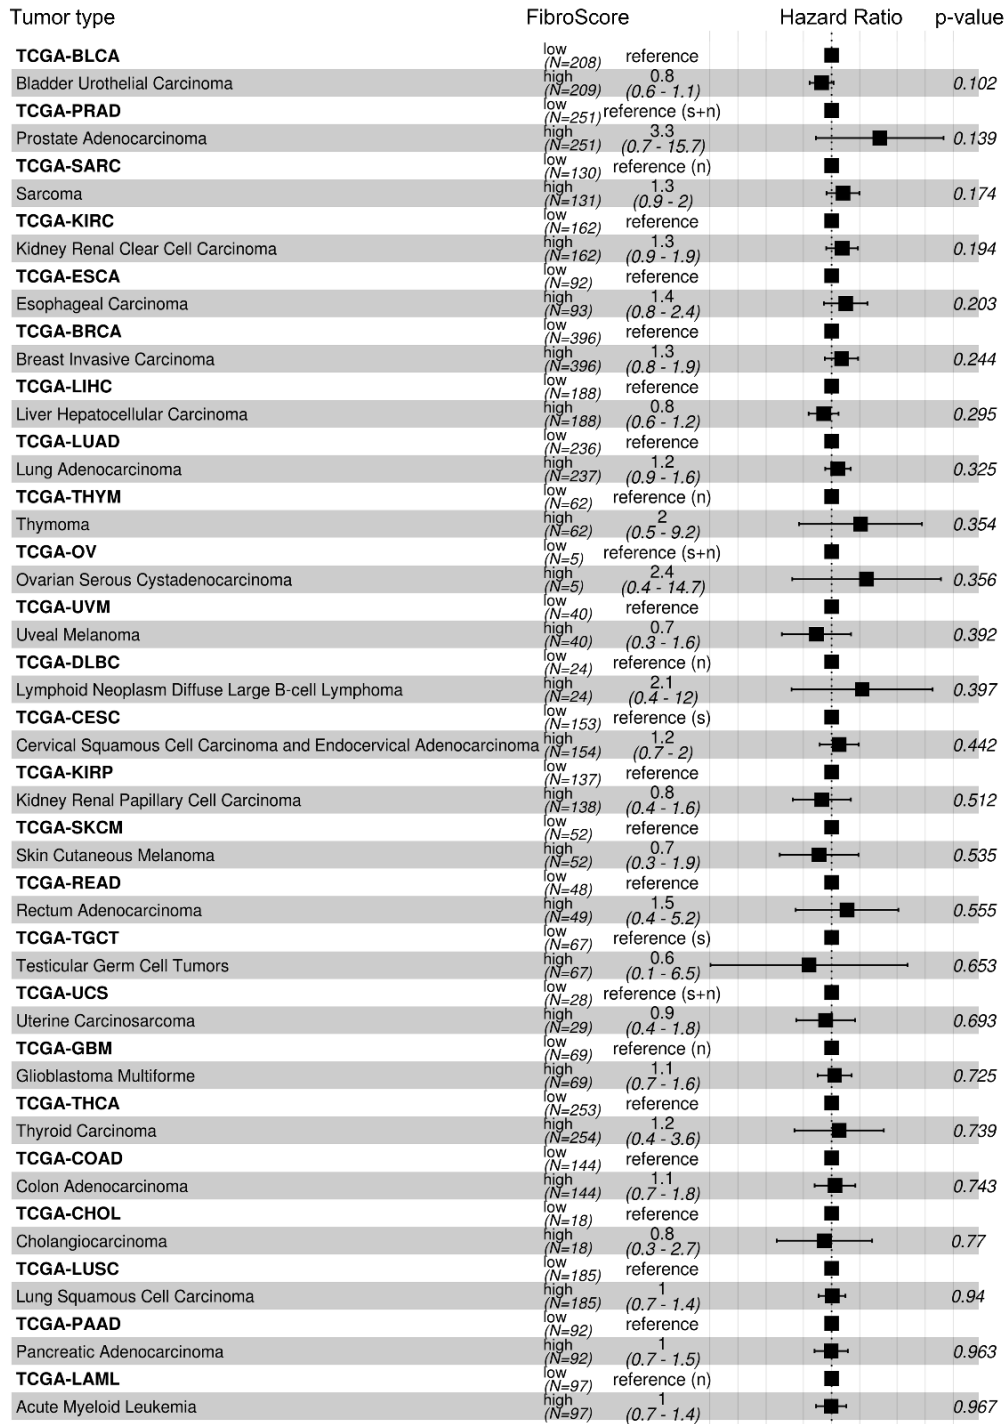

**Supplemental Figure S3: Survival analysis in other types of cancer**

Hazards ratios from Cox proportional hazards models for datasets from The Cancer Genome Atlas (TCGA). Depicted are all types of cancer for which there is no significant difference in overall survival for patients with either high or low FibroScore. Unless specified otherwise, models take into account sex, age, tumor stage, and the FibroScore stratified by the median (450K BeadChip data). If some of these parameters were not available, we indicated missing cofactors next to the reference: s = sex, a = age, and n = stage.

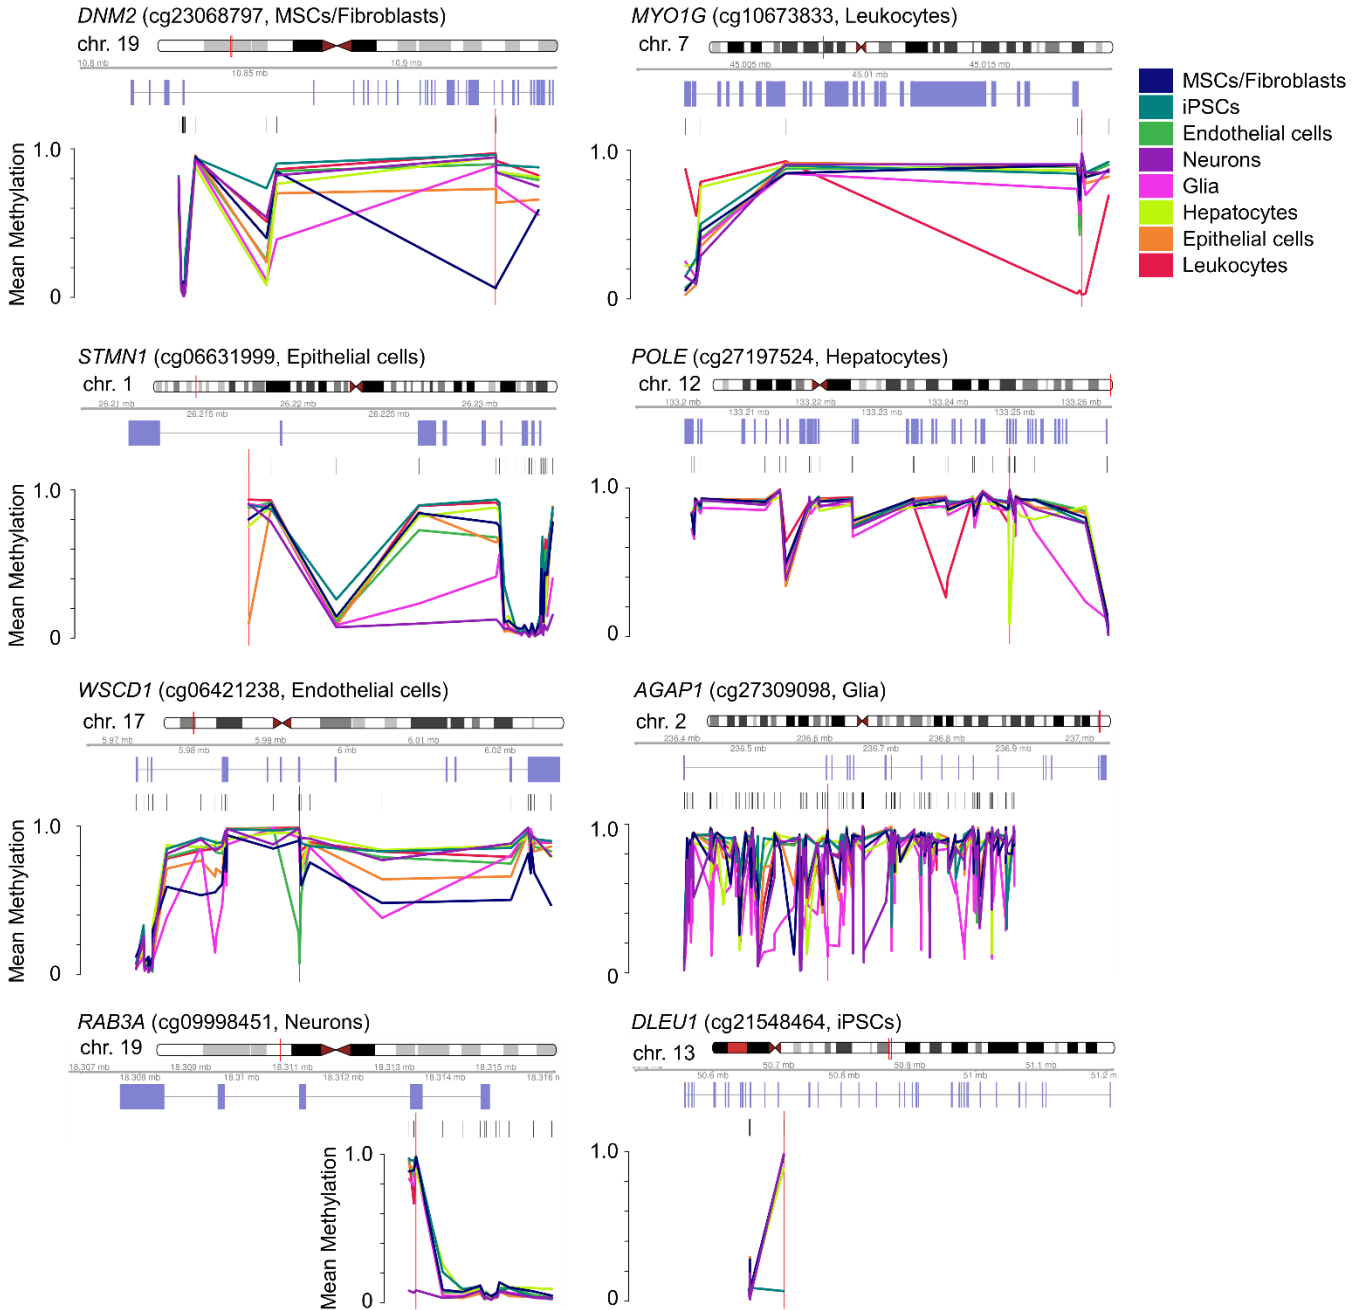

#### Supplemental Figure S4: Genomic context of cell-type-specific CpG sites

Chromosomal location and association with corresponding genes for the selected cell-type-specific CpGs: Dynamin 2 (*DNM2*), Myosin IG (*MYO1G*) encodes for the human minor histocompatibility antigen HA-2, which is only expressed in hematopoietic cells (65), Stathmin 1 (*STMN1*), DNA polymerase epsilon catalytic subunit A (*POLE*), WSC Domain Containing 1 (*WSCD1*), ArfGAP With GTPase Domain, Ankyrin Repeat And PH Domain 1 (*AGAP1*) is associated with neurodevelopmental disorders and overexpressed in brain (66), RAS-Associated Protein RAB3A (*RAB3A*) is also highly expressed in brain (66), and the lncRNA Deleted In Lymphocytic Leukemia 1 (*DLEU1*). Shown are mean  $\beta$  values from the training data set of neighboring CpGs for the respective cell types. The red lines depict the relevant CpGs.

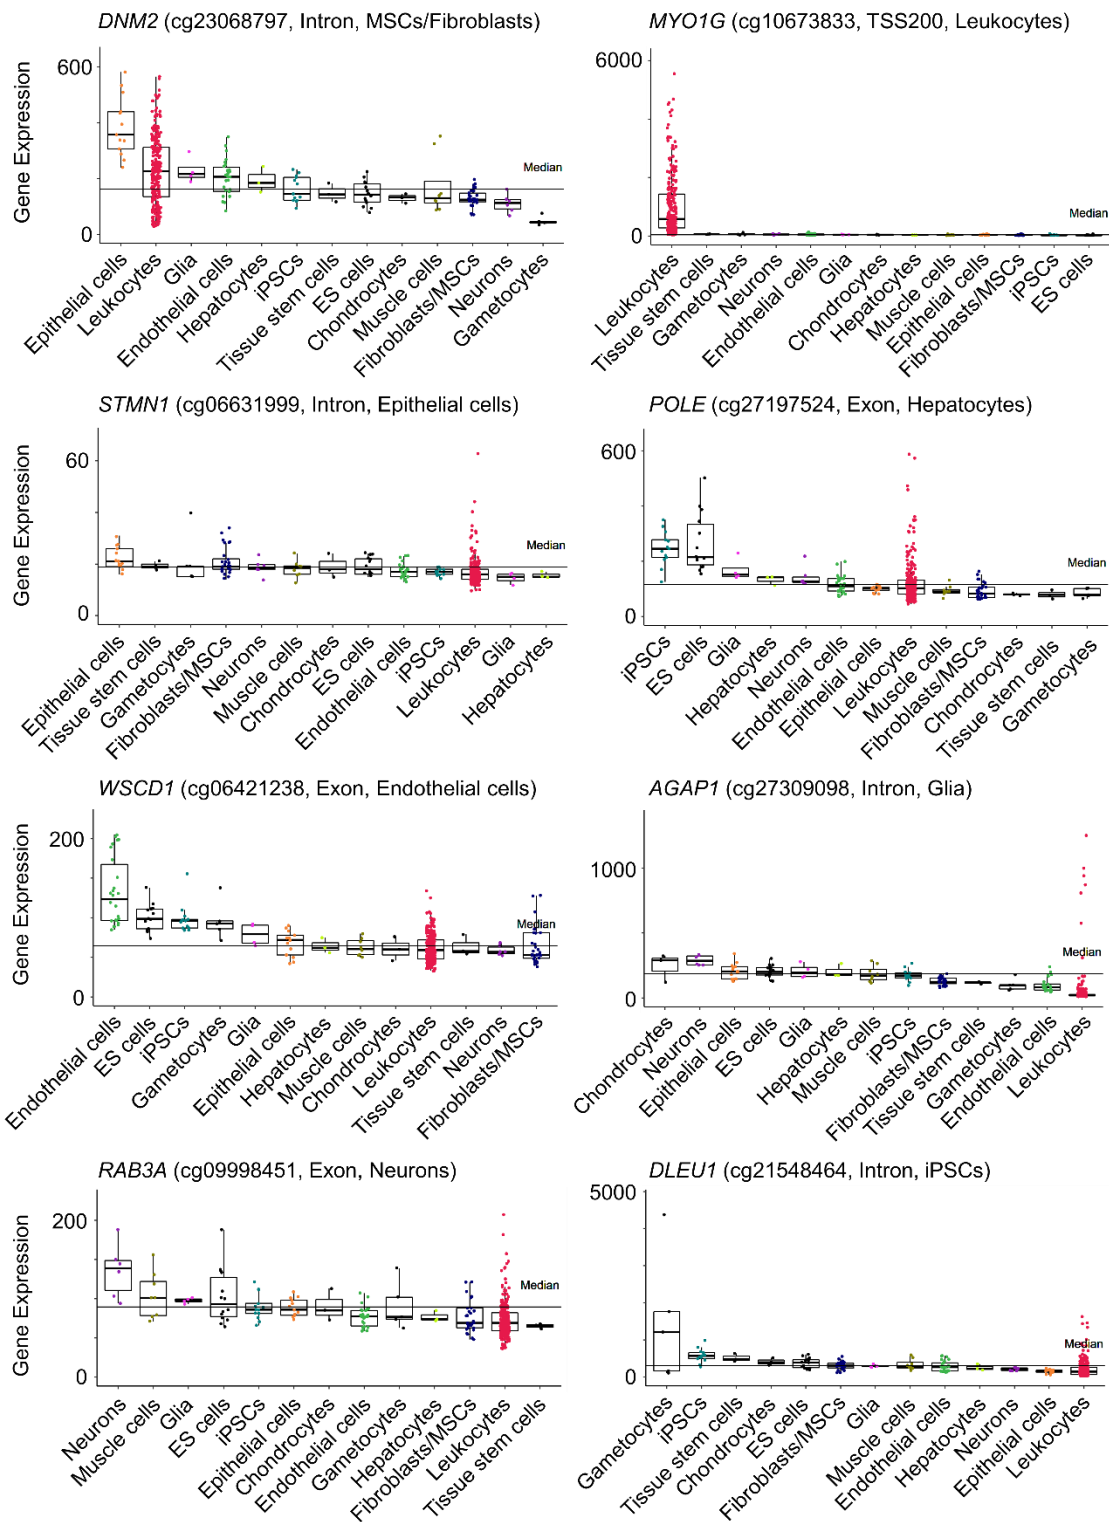

**Supplemental Figure S5: Gene expression of CpG related genes**

Gene expression (Affymetrix UG 133 Plus 2.0) of corresponding genes for the selected cell-type-specific CpGs: *DNM2* (202253\_s\_at), *MYO1G* (244654\_at), *STMN1* (1552803\_a\_at), *POLE* (216026\_s\_at), *WSCD1* (213157\_s\_at), *AGAP1* (204066\_s\_at), *RAB3A* (204974\_at) and the lncRNA *DLEU1* (219076\_s\_at) from the Primary Cell Atlas (67).

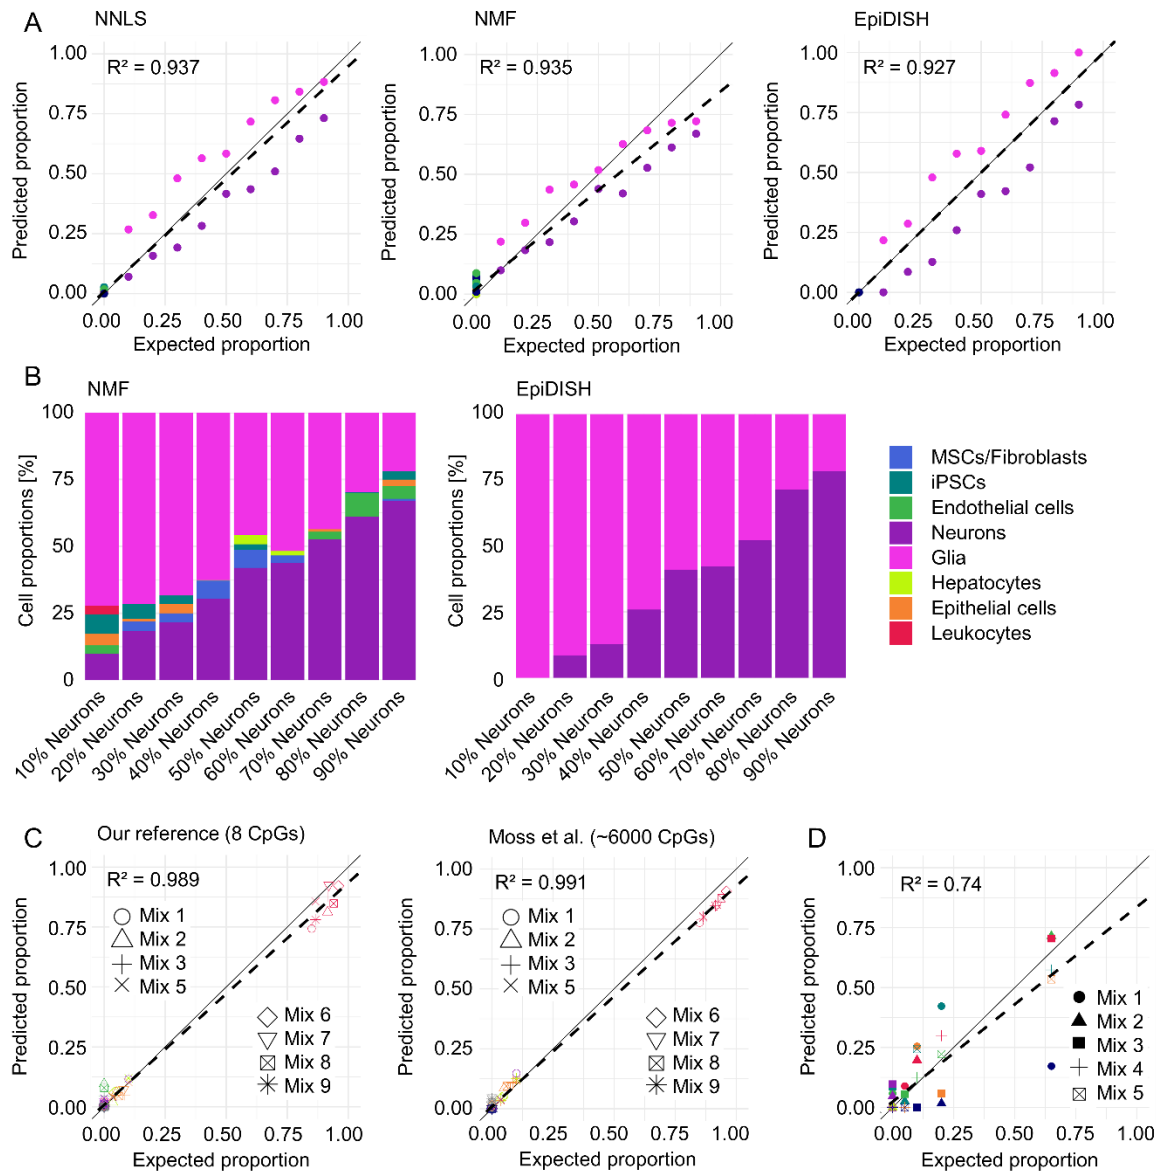

### Supplemental Figure S6: Comparison of different deconvolution methods

(A) In addition to the NNLS model, two alternative deconvolution approaches were considered for *in vitro* neuron-glia-DNA mixes from dataset GSE41826 (68): non-negative matrix factorization (NMF) and EpiDISH (69, 70). Comparison of expected *versus* predicted DNA proportions by deconvolution with different algorithms (NNLS, NMF and EpiDISH).

(B) The predicted cell fractions for the neuron-glia-DNA mixes from dataset GSE41826 (68) are depicted based on the eight cell-type-specific CpGs for NMF and EpiDISH. The best correlation of the predicted cell fractions with the real mixture of neurons/glia was observed for the NNLS-based deconvolution (Figure 4), while EpiDISH did not misclassify any other cell type.

(C) Cell type DNA mixes from dataset GSE122126 (7). Comparison of expected *versus* predicted DNA proportions by deconvolution with different reference matrices.

(D) Pyrosequencing of DNA mixes. Comparison of expected *versus* predicted DNA proportions by deconvolution.

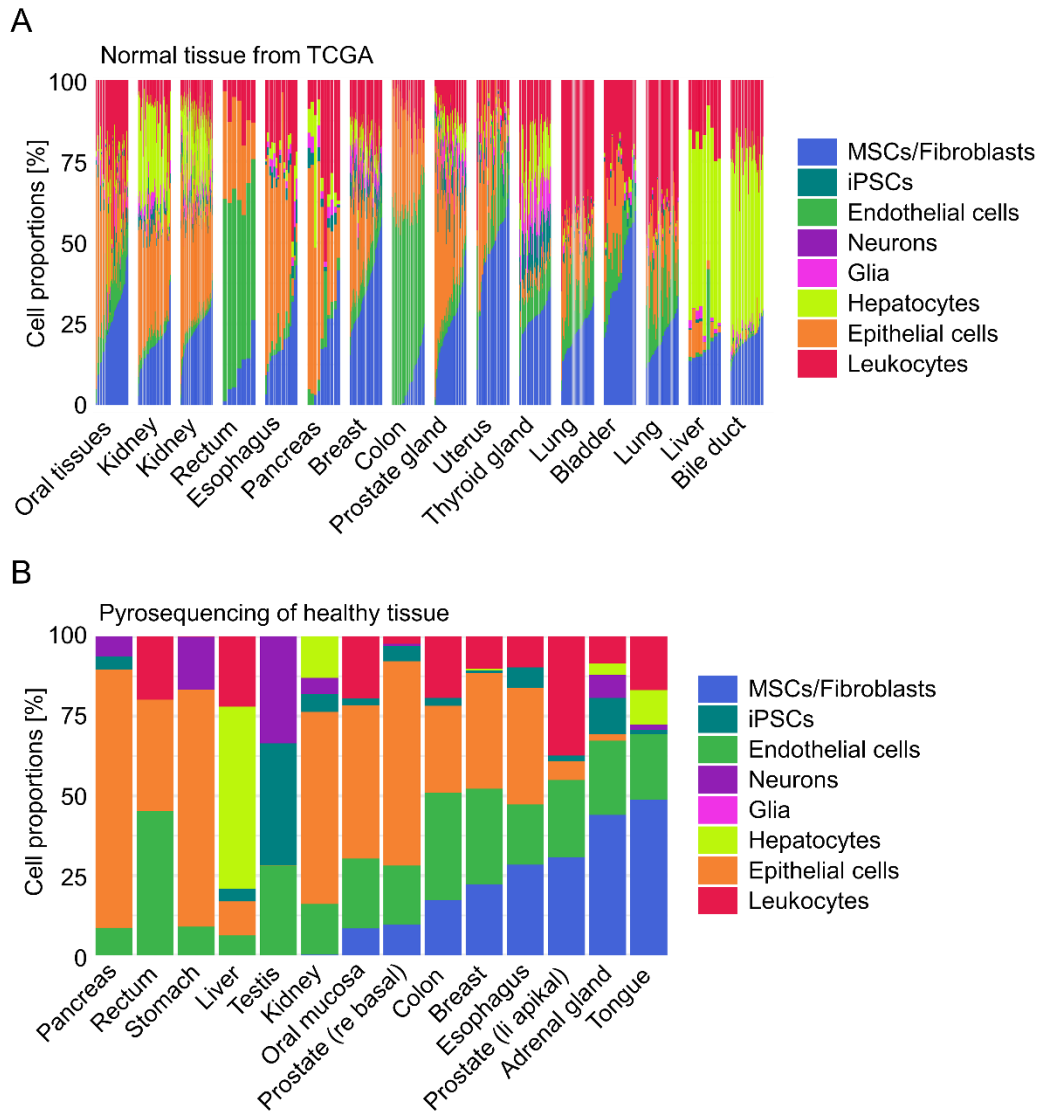

**Supplemental Figure S7: Deconvolution of cell mixtures based on individual cell-type-specific CpGs**

(A) Deconvolution of normal tissues from the TCGA database (450K BeadChip). Shown are estimated cellular fractions.

The relevant CpG for neurons was not available for TCGA datasets and therefore left out.

(B) Deconvolution of healthy tissues based on pyrosequencing of DNAm at the eight relevant CpGs.



cg18096962 (MSCs/Fibroblasts)

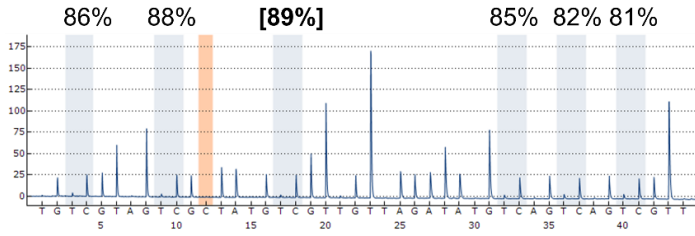

**Sequence to analyze:**

GYGTTGGGYGTAGYGGTTTTGTTTTTTTAGATT  
AGGGYGYGTTTTTGG

**Specific for:** MSCs/Fibroblasts

**Methylation in target cell type:** hypermethylated

**Sample:** MSCs

cg18005280 (MSCs/Fibroblasts)

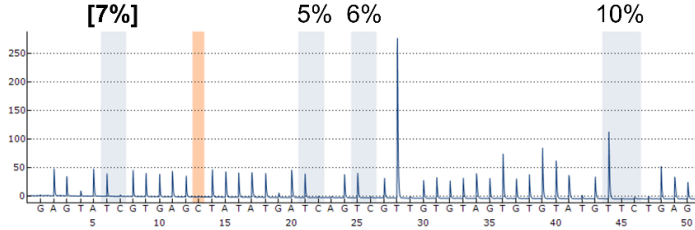

**Sequence to analyze:**

AGAYGTGAGTATATAYGYGTTTTTTTTTGTGTAG  
TTGTGGGTTAGTTTYGGAGT

**Specific for:** MSCs/Fibroblasts

**Methylation in target cell type:** hypomethylated

**Sample:** MSCs

cg23068797 (MSCs/Fibroblasts)

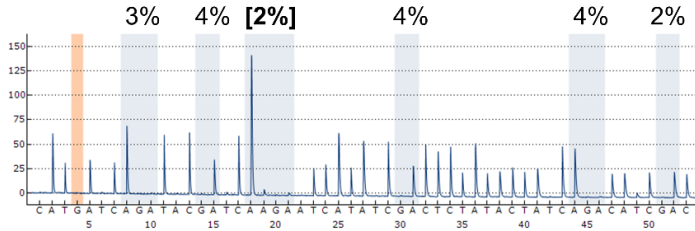

**Sequence to analyze:**

AATACRATTCCRCCRAAAAATCAATAACCRCT  
TCCTAATACTACCRACACRCA

**Specific for:** MSCs/Fibroblasts

**Methylation in target cell type:** hypomethylated

**Sample:** MSCs

cg10673833 (Leukocytes)

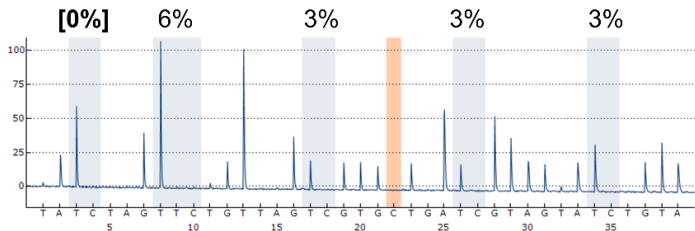

**Sequence to analyze:**

ATTYGGTTTTTYGTTTTTGGYGTGTAAYGGT  
TAGATYGTTAGG

**Specific for:** Leukocytes

**Methylation in target cell type:** hypomethylated

**Sample:** Whole blood

cg06631999 (Epithelial cells)

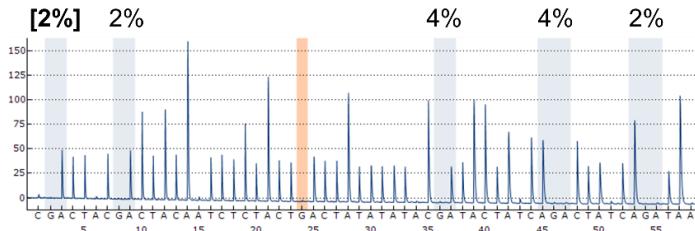

**Sequence to analyze:**

RCTCRCCTAACAAAATCTCCTAACTACTAAAT  
ATATCCCRTAACCCCTAACCRACCTACRAATAA  
AAT

**Specific for:** Epithelial cells

**Methylation in target cell type:** hypomethylated

**Sample:** Keratinocytes

cg27197524 (Hepatocytes)

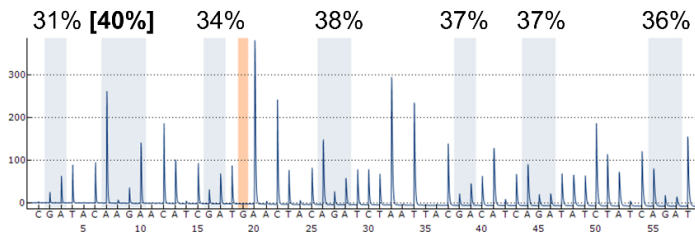

**Sequence to analyze:**

RTCRAAAACCAACRTAAAACCCCTCRAATCTAAA  
ATTTCCRCAACRATATCCCTTACCRATTTAAAA

**Specific for:** Hepatocytes

**Methylation in target cell type:** hypomethylated

**Sample:** Liver



cg06421238 (Endothelial cells)

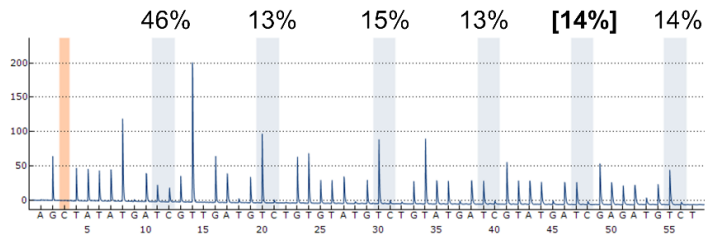

**Sequence to analyze:**

GGTATATTTAYGTTTTTTGGAGTTYGGTTGTAG  
TTYGTTTATAYGGTATAYGGAGAGTYG

**Specific for:** Endothelial cells

**Methylation in target cell type:** hypomethylated

**Sample:** HUVECs

cg27309098 (Glia)

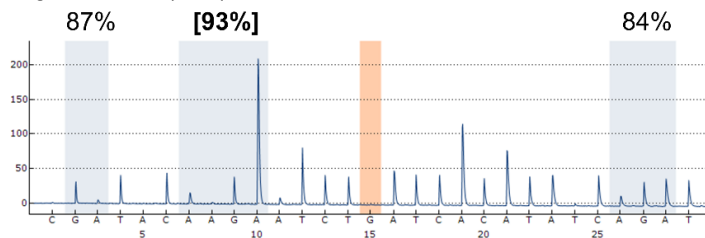

**Sequence to analyze:**

RTCRAAAAAATTCTATCAAACAATACRATA

**Specific for:** Glia

**Methylation in target cell type:** hypomethylated

**Sample:** HUVECs (as negative example)

cg09998451 (Neurons)

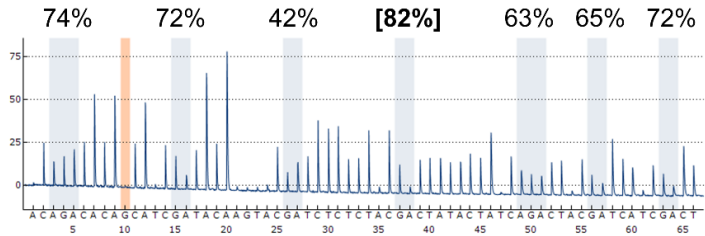

**Sequence to analyze:**

CRACAACAACAACRTAAACAAAACRTCCTTCC  
TCTTCCRCTATACTAACRACTCRTTCACRCCTA

**Specific for:** Neurons

**Methylation in target cell type:** hypomethylated

**Sample:** MSCs (as negative example)

cg21548464 (iPSCs)

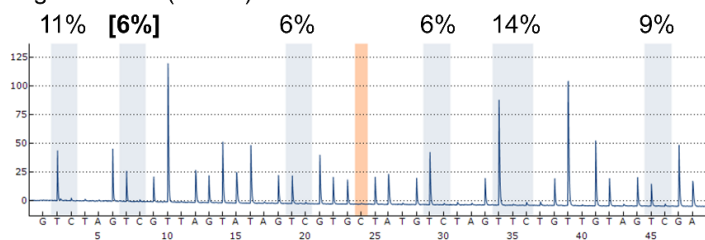

**Sequence to analyze:**

TYGGYTTTTTATGTTATTGYGGTGTAGTYGTTT  
TYGTTTTTTGGGTGYGGGAT

**Specific for:** iPSCs

**Methylation in target cell type:** hypomethylated

**Sample:** iPSCs

### Supplemental Figure S8: Representative pyrograms

Representative pyrograms are depicted for each pyrosequencing assay. Bisulfite conversion controls are marked in orange, CpG sites are marked in blue and the methylation level of the target CpG site is in square brackets. Images have been exported from the PyroMark Q48 Autoprep software from Qiagen.

**Supplemental Table S1. 450k/EPIC Illumina BeadChip datasets used in this study**

| <b>GSE</b>                | <b>SAMPLE TYPE</b>                                                                       | <b>NUMBER OF SAMPLES</b> | <b>REFERENCE IN MAIN TEXT</b> |
|---------------------------|------------------------------------------------------------------------------------------|--------------------------|-------------------------------|
| <b>Training dataset</b>   |                                                                                          |                          |                               |
| GSE34486*                 | endothelial cells                                                                        | 10                       | 17                            |
| GSE40699                  | muscle cells, epithelial cells, hepatocytes, fibroblasts, astrocyte, endothelial cells   | 26                       | 18                            |
| GSE41933                  | mesenchymal stromal cells                                                                | 12                       | 19                            |
| GSE43976                  | leukocytes                                                                               | 10                       | 20                            |
| GSE50222                  | leukocytes                                                                               | 8                        | 21                            |
| GSE52025                  | fibroblasts                                                                              | 2                        | 22                            |
| GSE52112                  | mesenchymal stromal cells                                                                | 34                       | 23                            |
| GSE58622                  | adipocytes                                                                               | 10                       | 24                            |
| GSE59065                  | leukocytes                                                                               | 20                       | 25                            |
| GSE59091                  | induced pluripotent stem cells, fibroblasts                                              | 12                       | 26                            |
| GSE59250                  | leukocytes                                                                               | 60                       | 27                            |
| GSE59796                  | leukocytes                                                                               | 4                        | 28                            |
| GSE60753                  | hepatocytes                                                                              | 15                       | 29                            |
| GSE63409                  | leukocytes                                                                               | 30                       | 30                            |
| GSE65078                  | induced pluripotent stem cells, fibroblasts                                              | 8                        | 31                            |
| GSE68134                  | induced pluripotent stem cells, fibroblasts                                              | 6                        | 32                            |
| GSE71955                  | leukocytes                                                                               | 20                       | 33                            |
| GSE74877                  | epithelial cells, melanocytes, mesenchymal stromal cells, fibroblasts, endothelial cells | 9                        | 34                            |
| GSE77135                  | fibroblasts                                                                              | 20                       | 35                            |
| GSE79144                  | glia, neurons                                                                            | 18                       | 36                            |
| GSE79695                  | mesenchymal stromal cells                                                                | 12                       | 37                            |
| GSE82234                  | endothelial cells                                                                        | 3                        | 38                            |
| GSE85647                  | leukocytes                                                                               | 6                        | 39                            |
| GSE87095                  | leukocytes                                                                               | 10                       | 30                            |
| GSE87177                  | endothelial cells                                                                        | 1                        | 41                            |
| GSE88824                  | leukocytes                                                                               | 16                       | 42                            |
| GSE92843                  | epithelial cells                                                                         | 1                        | 43                            |
| GSE95096                  | fibroblasts                                                                              | 1                        | 44                            |
| GSE98203                  | neurons                                                                                  | 10                       | 45                            |
| GSE99716                  | endothelial cells                                                                        | 1                        | 46                            |
| GSE103253*                | endothelial cells                                                                        | 10                       | 47                            |
| GSE107226                 | fibroblasts                                                                              | 4                        | 48                            |
| <b>Validation dataset</b> |                                                                                          |                          |                               |
| GSE34486*                 | endothelial cells                                                                        | 6                        | 17                            |
| GSE51921                  | iPSCs, fibroblasts                                                                       | 6                        | 49                            |
| GSE53302                  | muscle stem cells                                                                        | 6                        | 50                            |
| GSE68851                  | fibroblasts                                                                              | 12                       | 51                            |
| GSE71244                  | leukocytes                                                                               | 24                       | 52                            |
| GSE74486                  | glia, neurons                                                                            | 15                       | 53                            |
| GSE85566                  | epithelial cells                                                                         | 6                        | 54                            |
| GSE86258                  | fibroblasts                                                                              | 7                        | 55                            |
| GSE86829                  | fibroblasts                                                                              | 3                        | 56                            |
| GSE87797                  | mesenchymal stromal cells                                                                | 12                       | 57                            |
| GSE103253*                | endothelial cells                                                                        | 15                       | 47                            |
| GSE104287                 | leukocytes                                                                               | 8                        | 58                            |
| GSE106099                 | feto-placental endothelial cells                                                         | 12                       | 59                            |
| GSE109042                 | buccal epithelial cells                                                                  | 6                        | 60                            |
| GSE111396                 | fibroblasts                                                                              | 14                       | 61                            |
| GSE122126                 | adipocytes, neurons, hepatocytes, endothelial cells, epithelial cells, leukocytes        | 18 (13 EPIC)             | 7                             |
| <b>Other datasets</b>     |                                                                                          |                          |                               |
| GSE41826                  | glia-neuron DNA mixes                                                                    | 9                        | 68                            |
| GSE60753                  | normal and cirrhotic liver                                                               | 100                      | 29                            |
| GSE63704                  | normal and fibrotic lung                                                                 | 80                       | 63                            |
| GSE122126                 | cell type DNA mixes                                                                      | 8                        | 7                             |

\* Samples from these studies were considered either for training or validation sets

**Supplemental Table S2. Advantages and limitations of pyrosequencing *versus* Illumina BeadChips**

|                                                                | <b>PYROSEQUENCING<br/>OF 8 CPGS</b>    | <b>ILLUMINA METHYLATIONEPIC BEADCHIP<br/>(~ 850.000 CPGS)</b> |
|----------------------------------------------------------------|----------------------------------------|---------------------------------------------------------------|
| <b>Consumables per sample (including bisulfite conversion)</b> | ~ 40 €                                 | 175 € to 600 € *                                              |
| <b>Working time</b>                                            | 10 h **                                | Usually performed by service provider or core facility        |
| <b>Time until results</b>                                      | 2-3 days                               | weeks/months (dependent on service provider)                  |
| <b>Preferred total DNA amount</b>                              | 200 - 500 ng                           | 1200 ng                                                       |
| <b>Minimum input quantity of converted DNA</b>                 | 80 - 160 ng (10-20 ng per reaction)    | 250 ng                                                        |
| <b>Requirement of bioinformatic skills</b>                     | lower                                  | higher                                                        |
| <b>Data protection and privacy regulations</b>                 | analysis in house, no genome wide data | Genome wide profiles may theoretically reveal donor identity  |

\* The given price range comprises consumables and personnel costs. On our requests, there was a considerable price range between different providers and with possible cooperation agreements. Consumable costs only for Infinium MethylationEPIC BeadChip Kit are provided by Illumina about 250€/sample.

\*\* The working time needs to be taken into account for cost calculation. However, this is largely dependent on the number of samples that can be processed in parallel.

**Supplemental Table S3. Primer DNA sequences used for pyrosequencing**

| <b>NAME</b>               | <b>DNA SEQUENCE</b>                 |
|---------------------------|-------------------------------------|
| cg18096962_Forward        | GAGTATTGGGTTTATTTAGTTTTAGGAT        |
| cg18096962_Reverse_Biotin | TCAAATTCTATTTACTACCCTCTTCC          |
| cg18096962_Sequencing     | GTTTTTATTTTTGAG                     |
| cg18005280_Forward        | TATTGGTGTATTGGGGGAGG                |
| cg18005280_Reverse_Biotin | CCCACAACCATTCTAAAACAATC             |
| cg18005280_Sequencing     | TGTTATTGGGGGAGG                     |
| cg10673833_Forward        | TGTTGTTAGGGTTGGAAGTTAATTT           |
| cg10673833_Reverse_Biotin | CACCAACCTCCTCCAATACTAATATAA         |
| cg10673833_Sequencing     | GGGGAGGATTTAGT                      |
| cg06421238_Forward        | TTGTGGGGGATGGGTAGT                  |
| cg06421238_Reverse_Biotin | ACCTCCTCCCTACAAATCCTATATCT          |
| cg06421238_Sequencing     | GATAAAGTTTAGGAAGAGGTT               |
| cg06631999_Forward_Biotin | GGGTTGTTTTTTGGTTATTAGAGTTAGGTA      |
| cg06631999_Reverse        | CTCTTCTTTCCAATTTTTTCCAATAATC        |
| cg06631999_Sequencing     | CTCTAACTCAATCCCTAAATAC              |
| cg23068797_Forward_Biotin | TTTTTGGGTTTAGGAGGAATGTT             |
| cg23068797_Reverse        | CCAACTAATACCACATCTAAAACCTTTTACAATAC |
| cg23068797_Sequencing     | AATACCACATCTAAAACCTTTTAC            |
| cg27309098_Forward_Biotin | GAGGAAATTGAGGTTTAGAGATATGAA         |
| cg27309098_Reverse        | CTAAAATCAAACCTAAAATACAACCTCCTTAATA  |
| cg27309098_Sequencing     | CAAAAAATTTTTACC                     |
| cg27197524_Forward_Biotin | GAAGAATTTGAATTTTAGGGAAGAAGTAT       |
| cg27197524_Reverse        | CCCAACAAACAAAAACAAAAATTCAATA        |
| cg27197524_Sequencing     | TACTAACTCTAAAACCTAC                 |
| cg21548464_Forward        | GTTTTTTAGTTGGGATTTATTTAGATTTGT      |
| cg21548464_Reverse_Biotin | AACCCTTACCATCTTCTACCTAAACT          |
| cg21548464_Sequencing     | CATATTCAAATTCATCAT                  |
| cg09998451_Forward_Biotin | GGGAATTTTGTATTTTAGTTGTGGATTTTT      |
| cg09998451_Reverse        | TAAACCTCAATTAACCCCTACTCAA           |
| cg09998451_Sequencing     | GTAAAATTTGTTTGT                     |
